# Supplementary material
Source: Springer Nature journal article supplement (https://www.springermedizin.de/resource/supplementary/12894_2013_307_MOESM5_ESM.pdf/9513662)

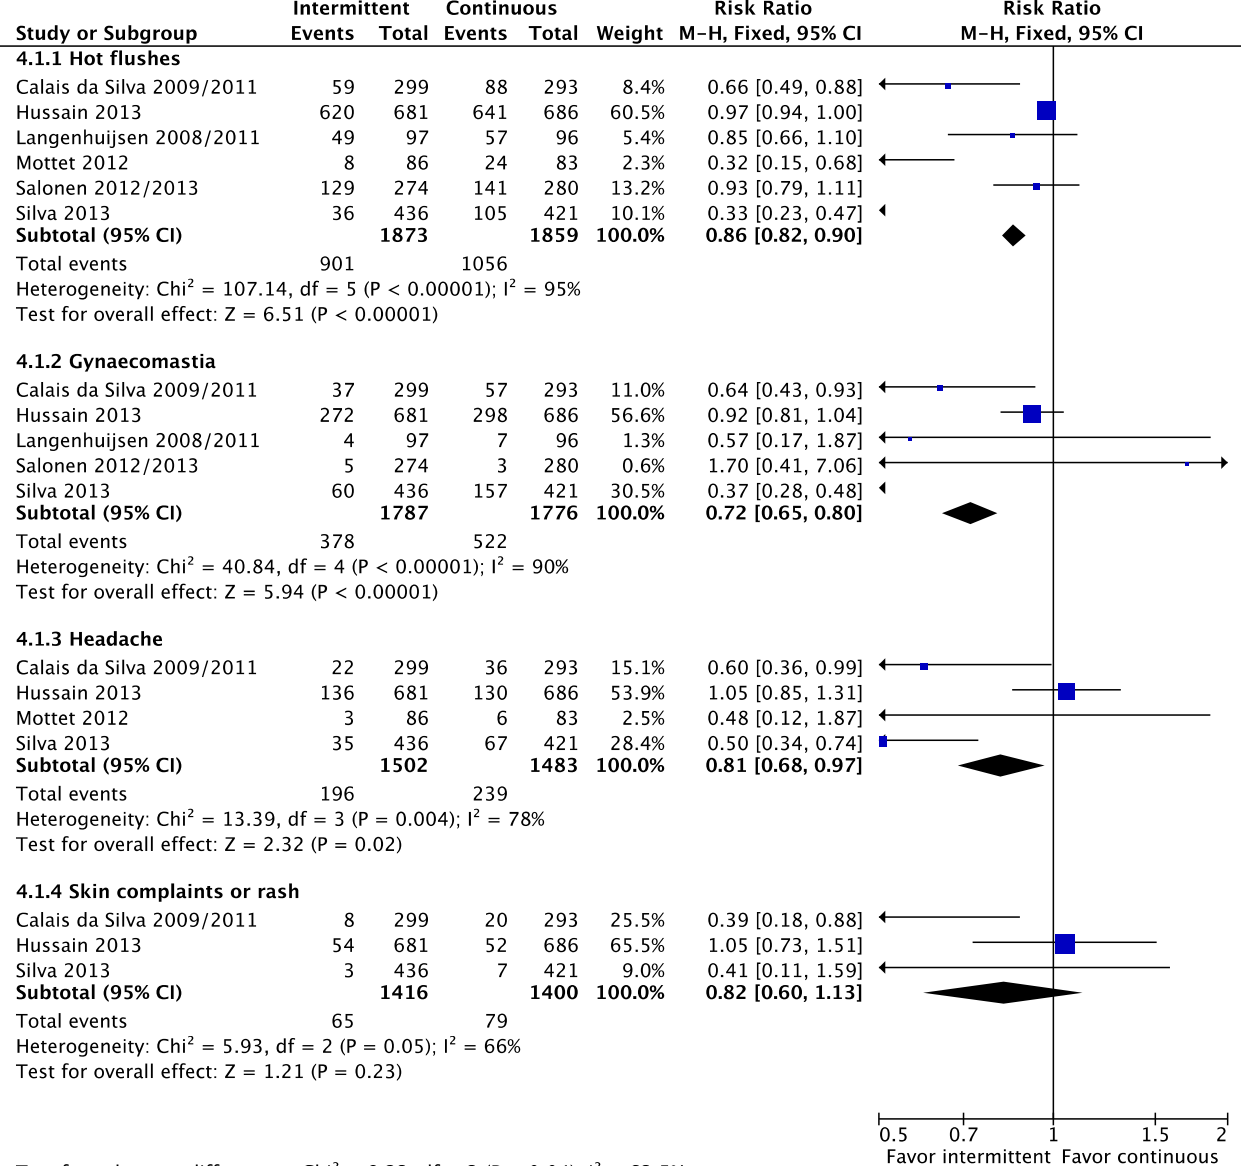

Test for subgroup differences: Chi<sup>2</sup> = 8.23, df = 3 (P = 0.04), I<sup>2</sup> = 63.5%

Supplement: MOESM5 [file 9513662]
